# Supplementary material for: MD-GAN with multi-particle input: the machine learning of long-time molecular behavior from short-time MD data
Source: Royal Society of Chemistry journal article supplement (doi:10.1039/d2sm00852a), 2022-01-01
Supplement: d2sm00852a1.pdf [file d2sm00852a1.pdf]

1           Electronic Supplementary Information (ESI) for  
2                   **MD-GAN with multi-particle input:**  
3           **the machine learning of long-time molecular**  
4                   **behavior from short-time MD data**

5           Ryo Kawada,<sup>1</sup> Katsuhiro Endo,<sup>1</sup> Daisuke Yuhara,<sup>2</sup> Kenji Yasuoka<sup>1\*</sup>

<sup>1</sup>Department of Mechanical Engineering, Keio University,  
                  3-14-1 Hiyoshi, Kohoku-ku, Yokohama, Kanagawa, 223-8522, Japan

<sup>2</sup>Materials Design Laboratory, Science & Innovation Center,  
                  R&D Transformation Div., Mitsubishi Chemical Holdings Group,  
                  1000 Kamoshida-cho, Aoba-ku, Yokohama, Kanagawa, 227-8502, Japan

                  \* E-mail: yasuoka@mech.keio.ac.jp (K.Y.)

6   **This PDF file includes:**

- 7   Section 1. Effects of introducing latent variables and distribution stabilization mechanisms  
8   Section 2. Detailed architecture of MD-GAN  
9   Section 3. How to calculate *err*  
10   Supplementary Fig. S1 Schematic view of time evolution in a low-dimensional space  
11   Supplementary Fig. S2 Detailed architecture of MD-GAN

## Section 1. Effects of introducing latent variables and distribution stabilization mechanisms

MD-GAN succeeds in reducing the exposure bias by introducing latent variables and distribution stabilization mechanisms. In general, most real-world data can be considered as lying along a low-dimensional manifold in a high-dimensional space[1, 2, 3]. Based on this idea, the evolution of the extracted trajectory of the subsystem is also represented as the evolution of dense latent variables, embedded in a low-dimensional space. Supplementary Fig. 1 shows the effects of these latent variables. The left figure is a conceptual figure of time evolution of a raw trajectory in high-dimensional space wherein no latent variables are introduced, while the right figure shows a conceptual figure of time evolution in low-dimensional space wherein latent variables are introduced. Each sphere represents  $M$  steps of trajectory information. In the figure on the left, the gray sphere is  $\mathbf{Y}_{k*M:(k+1)*M-1}$ , and the red and yellow spheres represent examples of points that might be taken as  $\mathbf{Y}_{(k+1)*M:(k+2)*M-1}$  after the next time evolution. In the figure on the right, the gray sphere is  $z_i$ , and the red sphere and yellow sphere represent examples of points that may be taken as  $z_{i+1}$  next. For visualization purposes, the figure on the left is drawn in three dimensions, but the actual dimension is  $3M$  for single-particle input. The reason for the  $3M$  dimension is that  $\mathbf{Y}_{k*M:(k+1)*M-1}$  is the information in  $xyz$  coordinates for  $M$  steps. Similarly, for the figure on the right, the latent variable may be more than two-dimensional(4 dimensions for single-particle input). The blue region represents the support where variables  $z_i$  and  $\mathbf{Y}_{k*M:(k+1)*M-1}$  can exist respectively, and it is called the manifold. When the gray sphere has information of the current  $M$  steps, it can take various states via stochastic transition, during the next time evolution. In this evolution, although the red sphere is on the manifold, the yellow sphere is off it. Assuming that a yellow sphere is input to MD-GAN in the estimation phase, the input is an unknown input in the training phase, and this may result in exposure bias. In the time evolution of a high-dimensional and sparse space, as shown in the left figure, it is likely to

37 deviate from the manifold, while in a low-dimensional and dense potential space, as shown in  
38 the right figure, it is less likely to deviate from the manifold. Therefore, the introduction of la-  
39 tent variables is expected to make it harder to deviate from the manifold through time evolution  
40 and contribute to the reduction of exposure bias.

41 The initial latent variable  $z_0$  is sampled from the  $n_z$ -dimensional uniform distribution  $U(S^{n_z})$ .  
42  $G_z$  generates further  $z_i$  using the previous  $z_{i-1}$  and a random value. We then apply  $G_z$  to  $z_0$  and  
43 repeatedly generate  $z_1, z_2$ , and so forth. After  $z_0$  is time evolved by  $G_z$ , there is no guarantee  
44 that the distribution of  $z_1$  will be as uniform as that of  $z_0$ . If they are different, the trajectories  
45 generated by  $G_Y$  from  $z_0$  and  $z_1$  will not satisfy the third assumption of MD-GAN. If the trajec-  
46 tories generated from  $z_0$  and  $z_1$  are used for training, then  $z_1$  is input to  $G_z$  in estimation phase,  
47 and this implies an unknown input and leads to the occurrence of exposure bias. Therefore,  $G_z$   
48 is applied repeatedly until the distribution of latent variables becomes stationary. After seven  
49 or more time evolutions, the latent variables obtain a stationary distribution and trajectories are  
50 generated from these latent variables. Thus, the mechanism that evolves in time until a station-  
51 ary distribution is obtained is the distribution stabilization mechanism, which contributes to the  
52 reduction of exposure bias.

## 53 **Section 2. Detailed architecture of MD-GAN**

54 Supplementary Fig. 2 shows the overall architecture of MD-GAN, and the architectures of  $G_Y$ ,  
55  $G_z$ , and  $D_G$  are shown in Supplementary Fig. 2A, B, and C, respectively. Supplementary Fig.  
56 2 describes the parameters used for the single-particle input. For the three-particle input, the  
57 number of channels for convolution was increased from three to nine, and the shape of  $y_k$  was  
58 set to  $64 \times 9$ . The optimizer was Adam[4], and the batch size was 64. The architecture of MD-  
59 GAN in a previous study[5] was based on U-Net. However, for ease of use, we changed the  
60 architecture to consist mainly of affine layers. There was no significant change in the execution

61 results owing to architectural changes. In addition, the previous study used two discriminators:  
62  $D_G$  and a discriminator that calculates the Wasserstein distance of two latent variables before  
63 and after the time evolution. In this study, we did not use the discriminator between the two  
64 latent variables.

### 65 **Section 3. How to calculate $err$**

66 In this paper,  $err$ , the evaluation index, is defined as

$$err := \int_{s_1}^{s_2} f(t) ds / \int_{s_1}^{s_2} ds \quad (1)$$

67 In the MSD prediction,  $s = \log_{10} t$ ,  $s_1$  corresponds to the time when  $n = 1/2$  diffusion ends,  
68 transition to  $n = 1$  diffusion begins, and  $s_2$  corresponds to the time when the transition ends and  
69 the normal diffusion to  $n = 1$  begins. When calculating  $err$ , appropriate discretization should  
70 be performed depending on the number of step skips. Transforming Eq. 1 into an expression  
71 with respect to  $t$ :

$$\int_{s_1}^{s_2} f(t) ds / \int_{s_1}^{s_2} ds = \int_{t_1}^{t_2} f(t) \frac{1}{t} dt / \int_{t_1}^{t_2} \frac{1}{t} dt \quad (2)$$

72 Let  $t_k = k\Delta t$  be the width of the time increment to be discretized, where  $\Delta t$  is the tick width  
73 after applying step skip, and is thus the product of the number of step skips and the output tick  
74 width of the MD data.  $k$  is the number of steps after applying step skip. Discretizing Eq. 2, we  
75 get

$$\sum_{k \in \text{transition area}} f(k\Delta t) \frac{1}{k\Delta t} \Delta t / \sum_{k \in \text{transition area}} \frac{1}{k\Delta t} \Delta t \quad (3)$$

$$= \sum_{k \in \text{transition area}} f(k\Delta t) \frac{1}{k} / \sum_{k \in \text{transition area}} \frac{1}{k} \quad (4)$$

76 From the above equation, the value of  $err$  in the MSD prediction can be obtained. In the  
77 prediction of the end-to-end vectors, considering  $s = t$ , we get

$$\sum_{k \in \text{area in which } C(t) \text{ is greater than } 0.1} f(k\Delta t) \Delta t / (t_2 - t_1) \quad (5)$$

## References

- 78
- 79 [1] Basri, R., Jacobs, D.W.: Lambertian reflectance and linear subspaces. *IEEE transactions on*  
80 *pattern analysis and machine intelligence* **25**(2), 218–233 (2003)
- 81 [2] Basri, R., Jacobs, D.: Efficient representation of low-dimensional manifolds using deep  
82 networks. *arXiv preprint arXiv:1602.04723* (2016) <https://arxiv.org/abs/1602.04723>
- 83 [3] Lee, K.-C., Ho, J., Yang, M.-H., Kriegman, D.: Video-based face recognition using proba-  
84 bilistic appearance manifolds. In: *2003 IEEE Computer Society Conference on Computer*  
85 *Vision and Pattern Recognition, 2003. Proceedings.*, vol. 1, p. . IEEE, ??? (2003)
- 86 [4] Kingma, D.P., Ba, J.: Adam: A Method for Stochastic Optimization. *arXiv:1412.6980 [cs]*  
87 (2017) <https://arxiv.org/abs/1412.6980>
- 88 [5] Endo, K., Tomobe, K., Yasuoka, K.: Multi-Step Time Series Generator for Molecular Dy-  
89 namics. *Proceedings of the AAAI Conference on Artificial Intelligence* **32**(1) (2018)

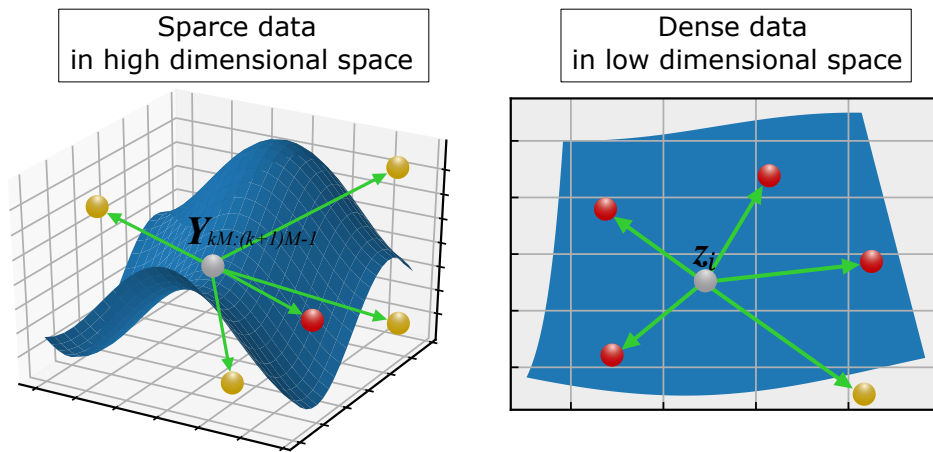

**Fig. S 1. Schematic view of time evolution in a low-dimensional space.** The gray, red, and yellow spheres contain the trajectory information for  $M$  steps of the extracted subsystem. The blue region is the manifold where the information of  $M$  steps can be found.

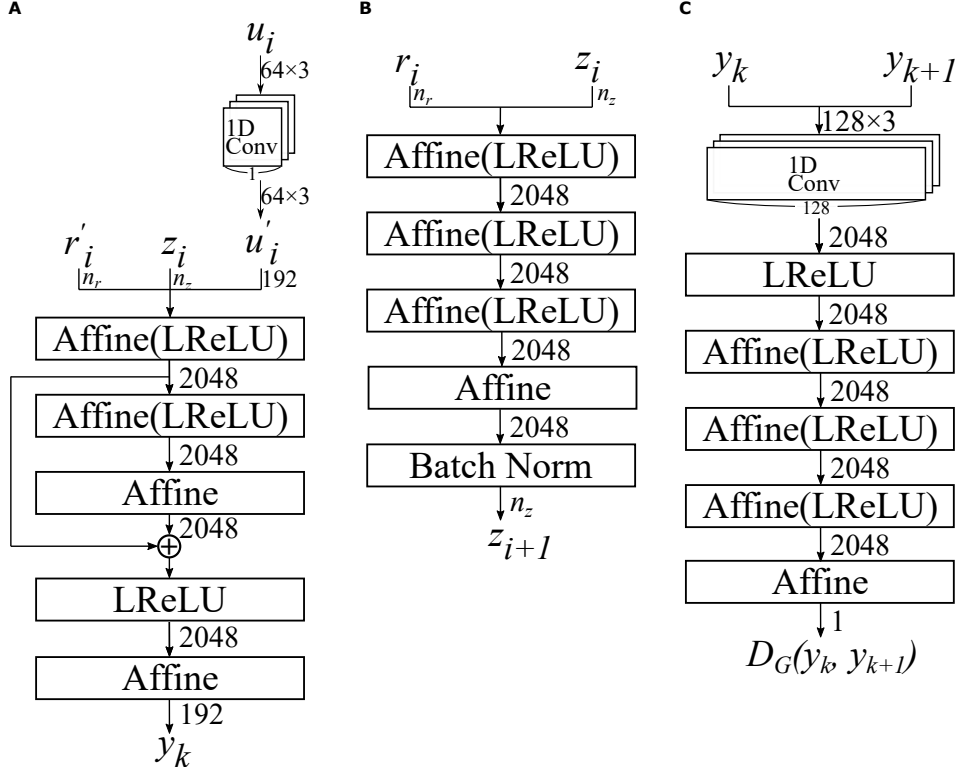

**Fig. S 2. Detailed architecture of MD-GAN.**  $r_i, r'_i$  are random numbers sampled from the uniform distribution,  $u_i$  are random numbers sampled from the normal distribution,  $z_i$  is a latent variable,  $n_r$  is the dimension of the random number,  $n_z$  is the dimension of the latent variable, and  $y_k$  is the trajectory for 64 steps. The numbers next to the arrows represent the shape of the output (batch size is omitted). **(A)** Architecture of  $G_Y$  In one-dimensional convolution, the kernel size is 1, the stride is 1, and the number of input and output channels are both 3. **(B)** Architecture of  $G_z$  **(C)** Architecture of  $D_G$  In one-dimensional convolution, the kernel size is 128, the stride is 128, the number of input channels is 3, and the number of output channels is 2048.
